# Supplementary material for: Single-Crystalline Gold Nanowires Synthesized from Light-Driven Oriented Attachment and Plasmon-Mediated Self-Assembly of Gold Nanorods or Nanoparticles
Source: PubMed Central journal article supplement (PMC5353694; doi:10.1038/srep44680), 2017-03-16
Supplement: srep44680-s1.pdf [file srep44680-s1.pdf]

# Single-Crystalline Gold Nanowires Synthesized from Light-Driven Oriented Attachment and Plasmon-Mediated Self-Assembly of Gold Nanorods or Nanoparticles

Shang-Yang Yu<sup>1</sup>, Hariyanto Gunawan<sup>1</sup>, Shiao-Wen Tsai<sup>2,3</sup>, Yun-Ju Chen<sup>1</sup>, Tzu-Chen Yen<sup>4,5</sup>, Jiunn-Woei Liaw<sup>1,4,6,7\*</sup>

<sup>1</sup>Department of Mechanical Engineering, Chang Gung University, Taiwan

<sup>2</sup>Institute of Biochemical and Biomedical Engineering, Chang Gung University, Taiwan

<sup>3</sup>Department of Orthopaedic Surgery, Chang Gung Memorial Hospital, Taiwan

<sup>4</sup>Center for Advanced Molecular Imaging and Translation, Chang Gung Memorial Hospital, Taiwan

<sup>5</sup>Department of Nuclear Medicine, Chang Gung Memorial Hospital, Taiwan

<sup>6</sup>Medical Physics Research Center, Institute for Radiological Research, Chang Gung University and Chang Gung Memorial Hospital, Taiwan

<sup>7</sup>Department of Mechanical Engineering, Ming Chi University of Technology, Taiwan

\*Corresponding authors: [markliaw@mail.cgu.edu.tw](mailto:markliaw@mail.cgu.edu.tw)

Via the guiding of linearly polarized lights, multi-step and multifunctional optical manipulations on the growth of Au NWs from the geometrically orientated attachment (OA) and 3D self-assembly of the primary, secondary, tertiary and even higher-order building units seem to accomplish efficiently. Moreover, the successive recrystallization annealing of mesocrystals plays a crucial role in the process of single-crystalline Au NWs through the plasmon-mediated photothermal effect. Two types of Au NRs were prepared; the first type with LSPR at 795 nm (AR= 4.18), and the second type at 859 nm (AR= 6.5). **Figure S1** and **S2** show different Au NWs with pentagonal and tetragonal cross sections, respectively. **Figure S3** shows the FE-SEM images of polycrystalline mesocrystals for the cases without sufficient post heat

treatment of recrystallization. Sometimes, an ultra-long NW can be self-assembled through the light-driven end-to-end and side-by-side OA of several Au NWs, as shown in **Figure S4**. In addition, the twisted micron-length Au belt can be produced, as shown in **Figure S5**. Because the fluence is not uniform in a Gaussian beam, various nanostructures can be obtained in a bigger droplet. Normally, the triangular dots are easily produced at the center zone of laser beam, where the fluence is highest. **Figure S6** shows various structures produced at different locations in a bigger droplet. At the center zone of laser beam, dendrite Au structures are usually produced due to over-heating, as shown in **Figure S7**. This is because that the originally self-assembled nanostructure is molten and then rapidly solidified after the laser power is turned off.

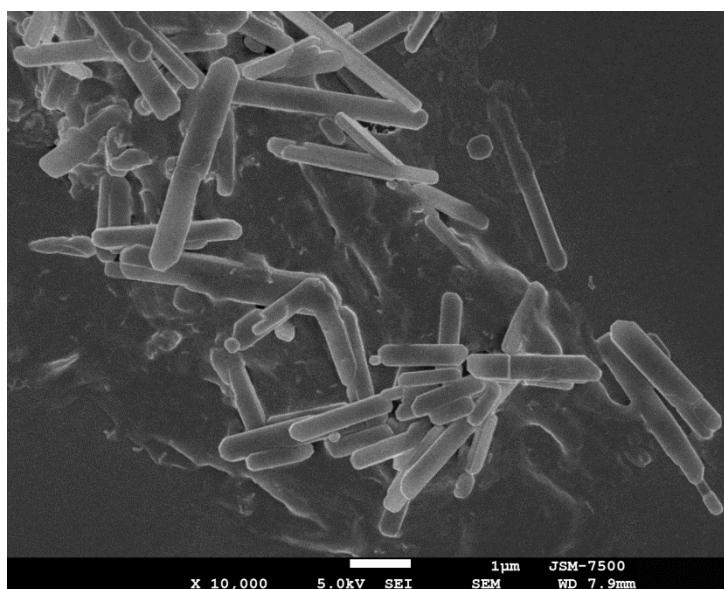

**Figure S1.** Micron-length anisotropic Au NWs. (3- $\mu$ l droplet containing 13-ppm Au NR colloid with LSPR at 795 nm, irradiated by 1064-nm laser with average fluence of 420 mW/cm<sup>2</sup> for 60 min)

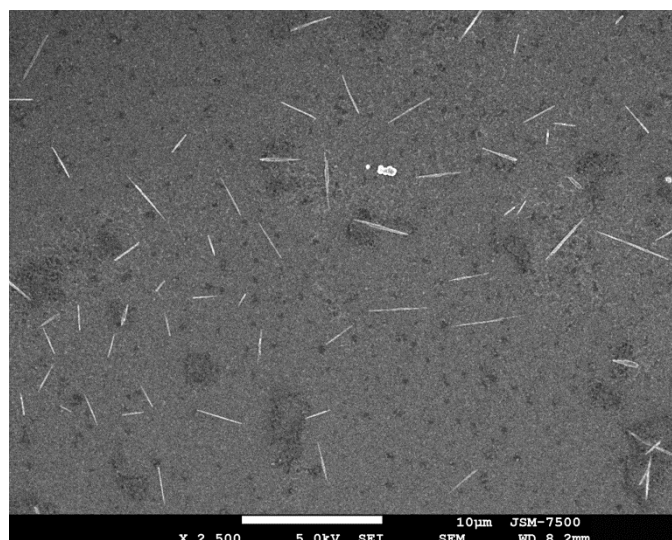

**Figure S2.** FE-SEM images of a lot of Au NWs with tetragonal cross section of low magnification (scale bar: 10  $\mu\text{m}$ ). (0.8- $\mu\text{l}$  droplet of containing 10-ppm Au NR colloid with LSPR at 859 nm, irradiated by 785-nm laser with average fluence of 140  $\text{mW}/\text{cm}^2$  for 40 min)

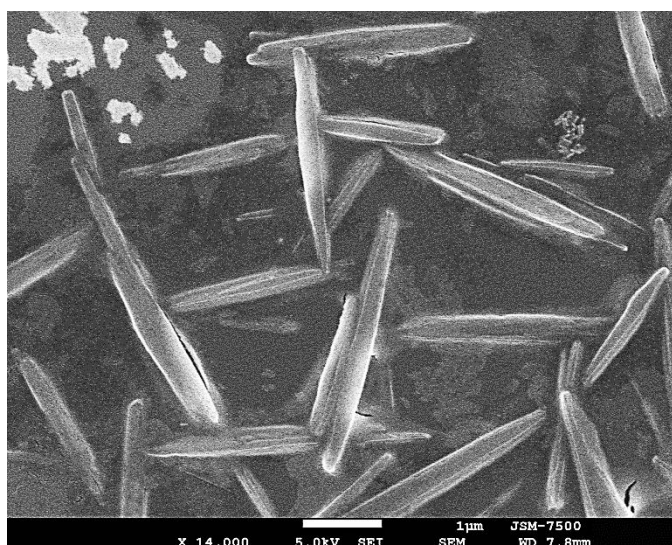

**Figure S3.** FE-SEM images of polycrystalline mesocrystals. (3- $\mu\text{l}$  droplet of containing 10-ppm Au NR colloid with LSPR at 795 nm, irradiated by 1064-nm laser with average fluence of 70  $\text{mW}/\text{cm}^2$  for 20 min and then 140  $\text{mW}/\text{cm}^2$  for 2 min)

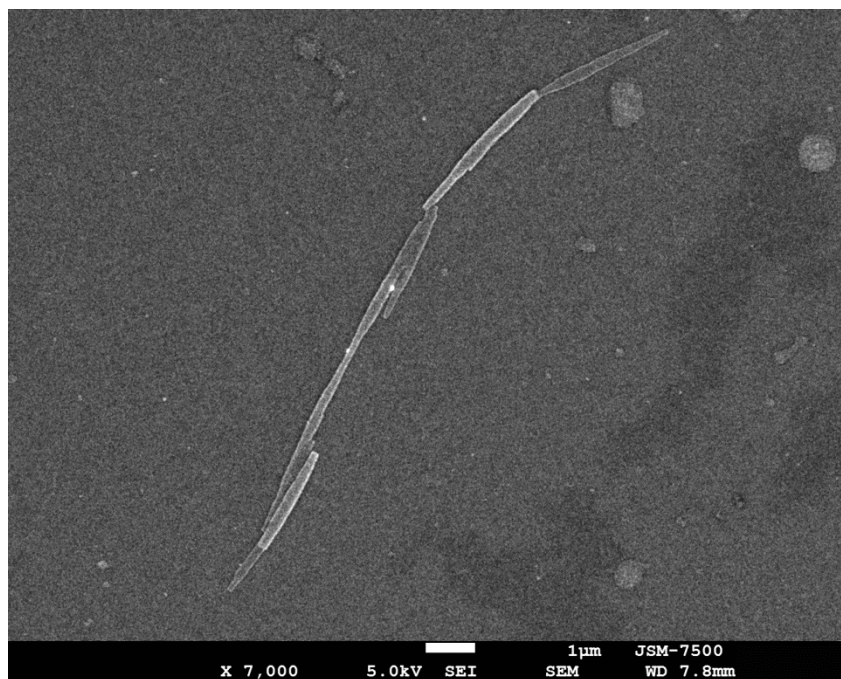

**Figure S4.** Ultra-long Au NW assembled by the end-to-end and side-by-side OA of several Au NWs (or tertiary building units) due to the optical forces and torques as well as the plasmonic coalescence. (3- $\mu\text{l}$  droplet containing 10-ppm Au NR colloid with LSPR at 859 nm, irradiated by 785-nm laser with average fluence of 140  $\text{mW}/\text{cm}^2$  for 35 min, and then 280  $\text{mW}/\text{cm}^2$  for 3 min)

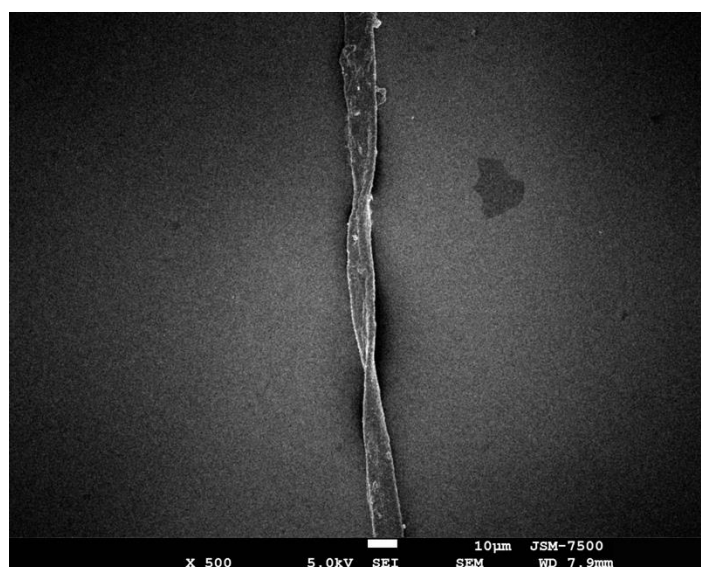

**Figure S5.** Twisted micron-length Au belt. (3- $\mu\text{l}$  droplet of containing 10-ppm Au NR colloid with LSPR at 859 nm, irradiated by 785-nm laser with average fluence of 70  $\text{mW}/\text{cm}^2$  for 50 min)

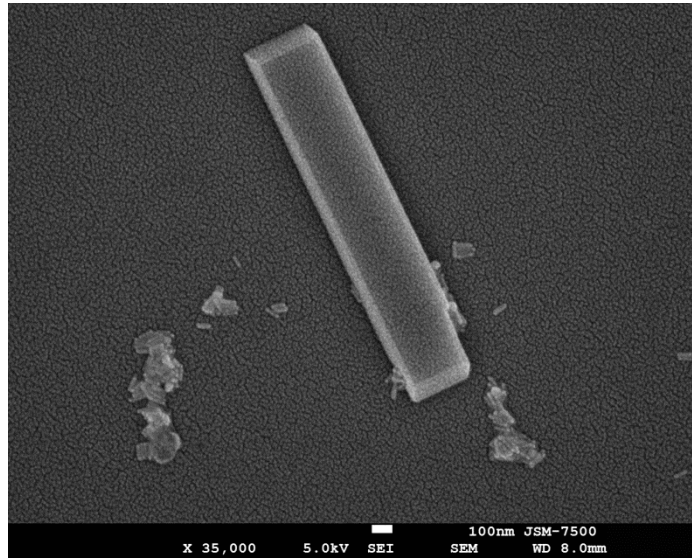

S6(a)

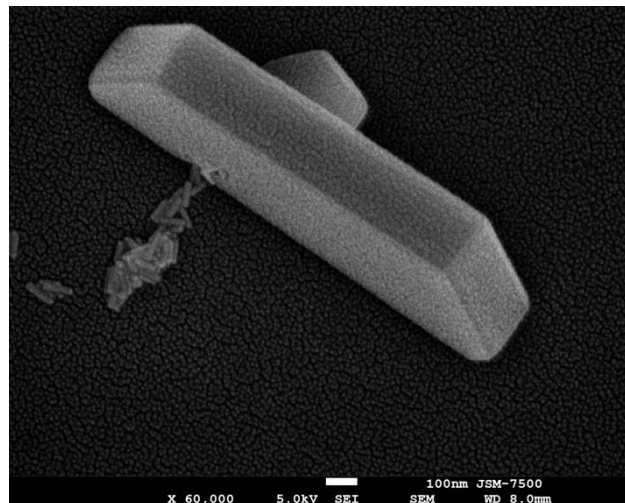

S6(b)

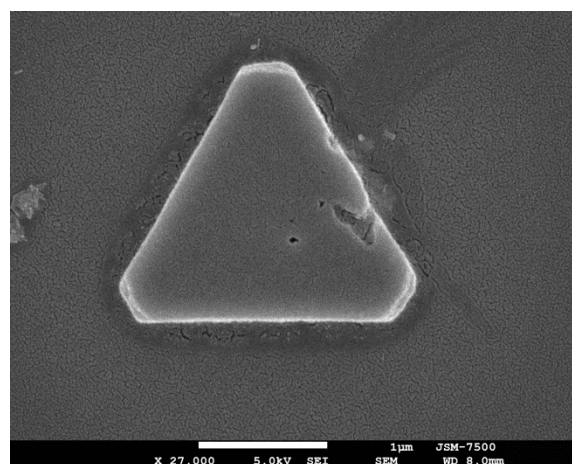

S6(c)

**Figure S6.** (a) Tetragonal Au NW with flat ends, (b) tetragonal Au NW with tapped ends and (c) triangular dot are produced at different locations in a bigger droplet of 3  $\mu\text{l}$  with 10-ppm Au NRs (LSPR: 859 nm) irradiated by 1064-nm laser. Three steps with different irradiation conditions are used; average fluence: 280  $\text{mW}/\text{cm}^2$  for 15 min, fluence: 140  $\text{mW}/\text{cm}^2$  for 10 min, and then fluence: 280  $\text{mW}/\text{cm}^2$  for 5 min.

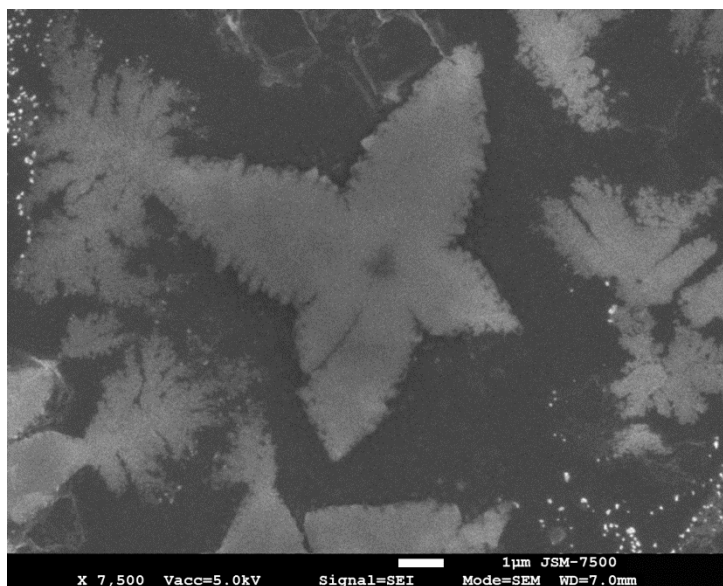

**Figure S7.** Dendrite Au structures are produced due to over-heating at the center zone of laser beam, where the fluence is highest. (3- $\mu\text{l}$  droplet containing 10-ppm Au NR colloid with LSPR at 859 nm, irradiated by 785-nm laser with average fluence of 140  $\text{mW}/\text{cm}^2$  for 40 min)
